# Supplementary material for: Assessment of arsenic contamination in agricultural soils of Gangetic basin in Buxar, Bhojpur and Patna districts in Bihar, India
Source: Research Square preprint supplement (doi:10.21203/rs.3.rs-1352838/v1), 2022-03-07
Supplement: Supplementary file 1 [file e6e625a25ea21d5bc5af7781.xlsx]

## Sheet: Health Risk assesment
	S.No.	As (mg kg-1)	CF	Er	Igeo	ADD	HQ	ILCR
Buxar	1	17.7	2.59151	25.9151	0.788829	2.52857e-05	0.0842857	3.79286e-05
	2	14.1	2.06442	20.6442	0.460775	2.01429e-05	0.0671429	3.02143e-05
	3	19.4	2.84041	28.4041	0.921137	2.77143e-05	0.092381	4.15714e-05
	4	17.2	2.5183	25.183	0.747489	2.45714e-05	0.0819048	3.68571e-05
	5	13.9	2.03514	20.3514	0.440165	1.98571e-05	0.0661905	2.97857e-05
	6	14.9	2.18155	21.8155	0.540392	2.12857e-05	0.0709524	3.19286e-05
	7	17.6	2.57687	25.7687	0.780655	2.51429e-05	0.0838095	3.77143e-05
	8	16.8	2.45974	24.5974	0.713541	2.4e-05	0.08	3.6e-05
	9	18.1	2.65007	26.5007	0.82107	2.58571e-05	0.0861905	3.87857e-05
	10	15.3	2.24012	22.4012	0.578612	2.18571e-05	0.0728571	3.27857e-05
	11	18.5	2.70864	27.0864	0.852605	2.64286e-05	0.0880952	3.96429e-05
	12	18.5	2.70864	27.0864	0.852605	2.64286e-05	0.0880952	3.96429e-05
	13	18.6	2.72328	27.2328	0.860383	2.65714e-05	0.0885714	3.98571e-05
	14	16.1	2.35725	23.5725	0.652141	2.3e-05	0.0766667	3.45e-05
	15	13.9	2.03514	20.3514	0.440165	1.98571e-05	0.0661905	2.97857e-05
	16	16.7	2.4451	24.451	0.704928	2.38571e-05	0.0795238	3.57857e-05
	17	17.3	2.53294	25.3294	0.755852	2.47143e-05	0.082381	3.70714e-05
	18	17.3	2.53294	25.3294	0.755852	2.47143e-05	0.082381	3.70714e-05
	19	15.2	2.22548	22.2548	0.569151	2.17143e-05	0.072381	3.25714e-05
	20	16.8	2.45974	24.5974	0.713541	2.4e-05	0.08	3.6e-05
	21	17.2	2.5183	25.183	0.747489	2.45714e-05	0.0819048	3.68571e-05
Bhojpur	1	18.4	2.694	26.94	0.844786	2.62857e-05	0.087619	3.94286e-05
	2	18.6	2.72328	27.2328	0.860383	2.65714e-05	0.0885714	3.98571e-05
	3	18.3	2.67936	26.7936	0.836924	2.61429e-05	0.0871429	3.92143e-05
	4	17.1	2.50366	25.0366	0.739076	2.44286e-05	0.0814286	3.66429e-05
	5	17.3	2.53294	25.3294	0.755852	2.47143e-05	0.082381	3.70714e-05
	6	18.2	2.66471	26.6471	0.829018	2.6e-05	0.0866667	3.9e-05
	7	17.6	2.57687	25.7687	0.780655	2.51429e-05	0.0838095	3.77143e-05
	8	20.4	2.98682	29.8682	0.993649	2.91429e-05	0.0971429	4.37143e-05
	9	20	2.92826	29.2826	0.96508	2.85714e-05	0.0952381	4.28571e-05
	10	14.9	2.18155	21.8155	0.540392	2.12857e-05	0.0709524	3.19286e-05
	11	13.9	2.03514	20.3514	0.440165	1.98571e-05	0.0661905	2.97857e-05
	12	15.8	2.31332	23.1332	0.625005	2.25714e-05	0.0752381	3.38571e-05
	13	14.9	2.18155	21.8155	0.540392	2.12857e-05	0.0709524	3.19286e-05
	14	18.7	2.73792	27.3792	0.868118	2.67143e-05	0.0890476	4.00714e-05
	15	15.9	2.32796	23.2796	0.634107	2.27143e-05	0.0757143	3.40714e-05
	16	19.4	2.84041	28.4041	0.921137	2.77143e-05	0.092381	4.15714e-05
	17	17.2	2.5183	25.183	0.747489	2.45714e-05	0.0819048	3.68571e-05
	18	14.5	2.12299	21.2299	0.501133	2.07143e-05	0.0690476	3.10714e-05
	19	18.7	2.73792	27.3792	0.868118	2.67143e-05	0.0890476	4.00714e-05
	20	14.7	2.15227	21.5227	0.520896	2.1e-05	0.07	3.15e-05
	21	15.3	2.24012	22.4012	0.578612	2.18571e-05	0.0728571	3.27857e-05
	22	16.1	2.35725	23.5725	0.652141	2.3e-05	0.0766667	3.45e-05
	23	17.4	2.54758	25.4758	0.764167	2.48571e-05	0.0828571	3.72857e-05
	24	17.1	2.50366	25.0366	0.739076	2.44286e-05	0.0814286	3.66429e-05
	25	14.9	2.18155	21.8155	0.540392	2.12857e-05	0.0709524	3.19286e-05
	26	17.4	2.54758	25.4758	0.764167	2.48571e-05	0.0828571	3.72857e-05
	27	16.9	2.47438	24.7438	0.722103	2.41429e-05	0.0804762	3.62143e-05
	28	21.1	3.08931	30.8931	1.04232	3.01429e-05	0.100476	4.52143e-05
	29	16.1	2.35725	23.5725	0.652141	2.3e-05	0.0766667	3.45e-05
	30	16.9	2.47438	24.7438	0.722103	2.41429e-05	0.0804762	3.62143e-05
	31	18.3	2.67936	26.7936	0.836924	2.61429e-05	0.0871429	3.92143e-05
	32	17.6	2.57687	25.7687	0.780655	2.51429e-05	0.0838095	3.77143e-05
	33	19.2	2.81113	28.1113	0.906186	2.74286e-05	0.0914286	4.11429e-05
	34	15.4	2.25476	22.5476	0.58801	2.2e-05	0.0733333	3.3e-05
Patna	1	17	2.48902	24.8902	0.730615	2.42857e-05	0.0809524	3.64286e-05
	2	15.6	2.28404	22.8404	0.606626	2.22857e-05	0.0742857	3.34286e-05
	3	18.1	2.65007	26.5007	0.82107	2.58571e-05	0.0861905	3.87857e-05
	4	19.4	2.84041	28.4041	0.921137	2.77143e-05	0.092381	4.15714e-05
	5	14.8	2.16691	21.6691	0.530677	2.11429e-05	0.0704762	3.17143e-05
	6	16.4	2.40117	24.0117	0.678776	2.34286e-05	0.0780952	3.51429e-05
	7	16.7	2.4451	24.451	0.704928	2.38571e-05	0.0795238	3.57857e-05
	8	17.7	2.59151	25.9151	0.788829	2.52857e-05	0.0842857	3.79286e-05
	9	16.2	2.37189	23.7189	0.661074	2.31429e-05	0.0771429	3.47143e-05
	10	20.4	2.98682	29.8682	0.993649	2.91429e-05	0.0971429	4.37143e-05
	11	17.8	2.60615	26.0615	0.796957	2.54286e-05	0.0847619	3.81429e-05
	12	15.5	2.2694	22.694	0.597348	2.21429e-05	0.0738095	3.32143e-05
	13	15.3	2.24012	22.4012	0.578612	2.18571e-05	0.0728571	3.27857e-05
	14	20.5	3.00146	30.0146	1.0007	2.92857e-05	0.097619	4.39286e-05
	15	17	2.48902	24.8902	0.730615	2.42857e-05	0.0809524	3.64286e-05
	16	16.2	2.37189	23.7189	0.661074	2.31429e-05	0.0771429	3.47143e-05
